# Supplementary material
Source: PubMed Central journal article supplement (PMC7457789)
Supplement: 13063_2020_4679_MOESM2_ESM.pdf [file 13063_2020_4679_MOESM2_ESM.pdf]

# Institutional Ethics Committee - Clinical Studies

Apollo Hospitals, Chennai

EC Reg. No.: ECR/37/Inst/TN/2013/RR-16

NABH Certificate No.: EC-CT-2018-0045

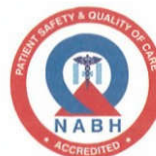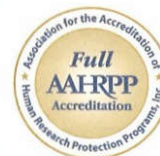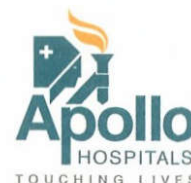

23 Jun 2020

To  
Dr. Bharath Kumar,  
Principal Investigator,  
Apollo Hospitals,  
Chennai, Tamil Nadu, India

**Ref: IEC Application No:** AMH-005/05-20

**Protocol No:** TGI-IN4673

**Title:** A randomized controlled trial of hydroxychloroquine (HCQ) as compared to standard care for the prevention of COVID-19 infections among healthcare workers exposed to SARS-CoV2

**Sub: Final Full Board** (Subsequent to your letter dated 05<sup>th</sup> & 17<sup>th</sup> June 2020).

Dear Dr. Bharath Kumar,

The Institutional Ethics Committee – Clinical Studies, Apollo Hospitals reviewed and discussed the documents submitted by you related to the conduct of above mentioned study at the meeting held on 22<sup>nd</sup> Jun 2020.

| S.No | Contents                                             | Version and Date               |
|------|------------------------------------------------------|--------------------------------|
| 1.   | Study Protocol                                       | Version 3.0 dated 03-Jun-2020  |
| 2.   | Protocol summary of changes                          | Version 3.0 dated 03-Jun-2020  |
| 3.   | Participant Information Sheet & Consent Form-English | Version 1.0 dated 04-Jun-2020  |
| 4.   | Hydroxychloroquine-Dug Information                   | dated 17 March 2020            |
| 5.   | George Institute for Global Health-Approval letter   | dated 5 <sup>th</sup> May 2020 |
| 6.   | CRF                                                  | Version 1.0 dated 03-Jun-2020  |
| 7.   | Draft Clinical Trial Agreement                       | Not Applicable                 |
| 8.   | Fully Executed Clinical Trial Agreement              | Dated 17th Jun 2020            |
| 9.   | Participant Information Sheet & Consent Form Telugu  | Version 1.0 dated 4th Jun 2020 |
| 10.  | Participant Information Sheet & Consent Form Hindi   | Version 1.0 dated 4th Jun 2020 |
| 11.  | Participant Information Sheet & Consent Form Tamil   | Version 1.0 dated 4th Jun 2020 |

The following Institutional Ethics Committee – Clinical Studies members were present at the meeting held on 22<sup>nd</sup> Jun 2020 at 03:00 pm via virtual meeting.

| S. No. | Name                | M/F | Qualification         | Designation                      | Affiliated Y/N | Position in the committee |
|--------|---------------------|-----|-----------------------|----------------------------------|----------------|---------------------------|
| 1.     | Dr. R. Ramakrishnan | M   | M.Sc., Ph.D,<br>M.A.E | Consultant/<br>Ex -Scientist "G" | No             | Chairperson               |

**Apollo Hospitals Enterprise Limited**

21, Greams Lane, Off Greams Road, Chennai - 600 006, Tamil Nadu, India. Tel : +91-44-2829 5045 Fax : +91-44-2829 4449

E-mail: ecapollochennai@gmail.com

# Institutional Ethics Committee - Clinical Studies

Apollo Hospitals, Chennai

EC Reg. No.: ECR/37/Inst/TN/2013/RR-16

NABH Certificate No.: EC-CT-2018-0045



| S. No. | Name                        | M/F | Qualification                    | Designation                                         | Affiliated Y/N | Position in the committee         |
|--------|-----------------------------|-----|----------------------------------|-----------------------------------------------------|----------------|-----------------------------------|
| 2.     | Dr. Rema Menon              | F   | MBBS                             | HOD (Blood Bank Transfusion Services)               | Yes            | Member Secretary                  |
| 3.     | Dr. Nirumal Rakkesh **      | M   | MBBS, M.D. (Pharmacology)        | Pharmacologist                                      | Yes            | Alternate Basic Medical Scientist |
| 4.     | Dr. Arun Chander Yadav. K * | M   | MBBS, M.D. (Pharmacology)        | Pharmacologist                                      | Yes            | Basic Medical Scientist           |
| 5.     | Dr. Rathna Devi             | F   | MBBS, DMRT                       | Sr. Consultant Radiation Oncologist                 | Yes            | Member (Clinician)                |
| 6.     | Dr. K. Sathyamurthi         | M   | M.A. (Social Work), PGDHRM, Ph.D | HOD Department of Research Programme in Social Work | No             | Social Scientist                  |
| 7.     | Mr. Cibi Vishnu             | M   | B. Com., L.L.B., English Law     | Lawyer                                              | No             | Lawyer                            |
| 8.     | Mrs. Padma Priya            | F   | B.A. (History) & M.A. (Hindi)    | Home Maker                                          | No             | Layperson                         |

\*\* Alternate Basic Medical Scientist

\* Dr. Arun Chander Yadav. K cited conflict of interest and didn't participate in the decision-making process.

After due ethical and scientific consideration, the Ethics Committee has approved all the documents and the study to be conducted by you in the presented form.

Please note that the date of initiation of the study, the date of first patient and last patient participation and the site close out should be informed to the Ethics Committee. The Ethics Committee should also be informed about the progress of the study on **Half yearly basis**. Any changes in the protocol and patient information / informed consent, and a copy of the final clinical study report should be submitted. Please submit a complaints and non compliance form to EC after each monitoring/inspection.. The AEs are to be reported before each EC meeting. Submit a report of protocol deviations/violations and serious adverse event as per regulatory timeline and mention the reason for delay, if any.

**Please note the period of validity of this approval is for one calendar year and ends on 22<sup>nd</sup> Jun 2021.**

The Institutional Ethics Committee – Clinical Studies is constituted and works as per ICH-GCP, National Ethical Guidelines for Biomedical and Health Research involving Human Participants (ICMR 2017) and New drugs and Clinical Trial Rules, March 2019.

**Apollo Hospitals Enterprise Limited**

21, Greams Lane, Off Greams Road, Chennai - 600 006, Tamil Nadu, India. Tel : +91-44-2829 5045 Fax : +91-44-2829 4449

E-mail: [ecapollochennai@gmail.com](mailto:ecapollochennai@gmail.com)

# Institutional Ethics Committee - Clinical Studies

Apollo Hospitals, Chennai

EC Reg. No.: ECR/37/Inst/TN/2013/RR-19

NABH Certificate No.: EC-CT-2018-0045

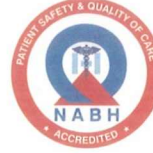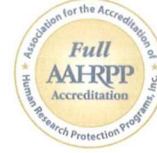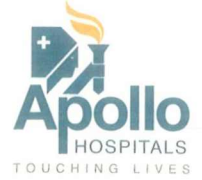

Yours Sincerely,

*Rema Menon*

**MEMBER SECRETARY**  
INSTITUTIONAL ETHICS COMMITTEE CLINICAL STUDIES  
APOLLO HOSPITALS, AHEL  
CHENNAI, TAMIL NADU

Dr. Rema Menon, 24/06/2020

Member Secretary

Institutional Ethics Committee – Clinical Studies

Apollo Hospitals, Chennai

Tamil Nadu, India.

**Status: Final Full Board Approval**

**IEC Application No.:** AMH-005/05-20 (NOTE: Please quote this application no. in all your future communications)
